# Supplementary material for: Phytochemical Analysis of the Methanolic Extract and Essential Oil from Leaves of Industrial Hemp Futura 75 Cultivar: Isolation of a New Cannabinoid Derivative and Biological Profile Using Computational Approaches
Source: MDPI journal article supplement (doi:10.3390/plants11131671), 2022-06-24
Supplement: s1 [file s1]

# Phytochemical analysis of methanol extracts and of essential oil from leaves of industrial hemp *Futura 75* cultivar: Isolation of a new cannabinoid derivative and biological profile using computational approaches.

Simona De Vita<sup>1,‡</sup>, Claudia Finamore<sup>2,‡</sup>, Maria Giovanna Chini<sup>3</sup>, Gabriella Saviano<sup>3</sup>, Vincenzo De Felice<sup>3</sup>, Simona De Marino<sup>2</sup>, Gianluigi Lauro<sup>1</sup>, Agostino Casapullo<sup>1</sup>, Francesca Fantasma<sup>3</sup>, Federico Trombetta<sup>4</sup>, Giuseppe Bifulco<sup>1\*</sup>, Maria Iorizzi<sup>3\*</sup>

<sup>1</sup> Department of Pharmacy, University of Salerno, Via Giovanni Paolo II 132, 84084, Fisciano, Salerno, Italy; sdevita@unisa.it (S.D.V.); glauro@unisa.it (G.L.); casapullo@unisa.it (A.C.)

<sup>2</sup> Department of Pharmacy, University of Naples, Via Domenico Montesano, 49, 80131 Naples, Italy; claudia.finamore@unina.it (C.F.); sidemari@unina.it (S.D.M.)

<sup>3</sup> Department of Biosciences and Territory, University of Molise, Contrada Fonte Lappone, Pesche, 86090 Isernia, Italy; mariagiovanna.chini@unimol.it (M.G.C.); saviano@unimol.it (G.S.); defelice@unimol.it (V.D.F.); fantasma@unimol.it (F.F.)

<sup>4</sup> Società Cooperativa Agricola MarcheSana, Località San Biagio 40, 61032, Fano, Pesaro-Urbino, Italy

<sup>‡</sup> These authors contributed equally to this work

\* Correspondence: bifulco@unisa.it (G.B.); Tel.: (+39)089969741 and iorizzi@unimol.it (M.I.); Tel.: (+39)0874404100.

## <sup>1</sup>H NMR (CD<sub>3</sub>OD, 400 MHz) of 2 $\alpha$ -hydroxy- $\Delta^{3,7}$ -cannabitol (1)

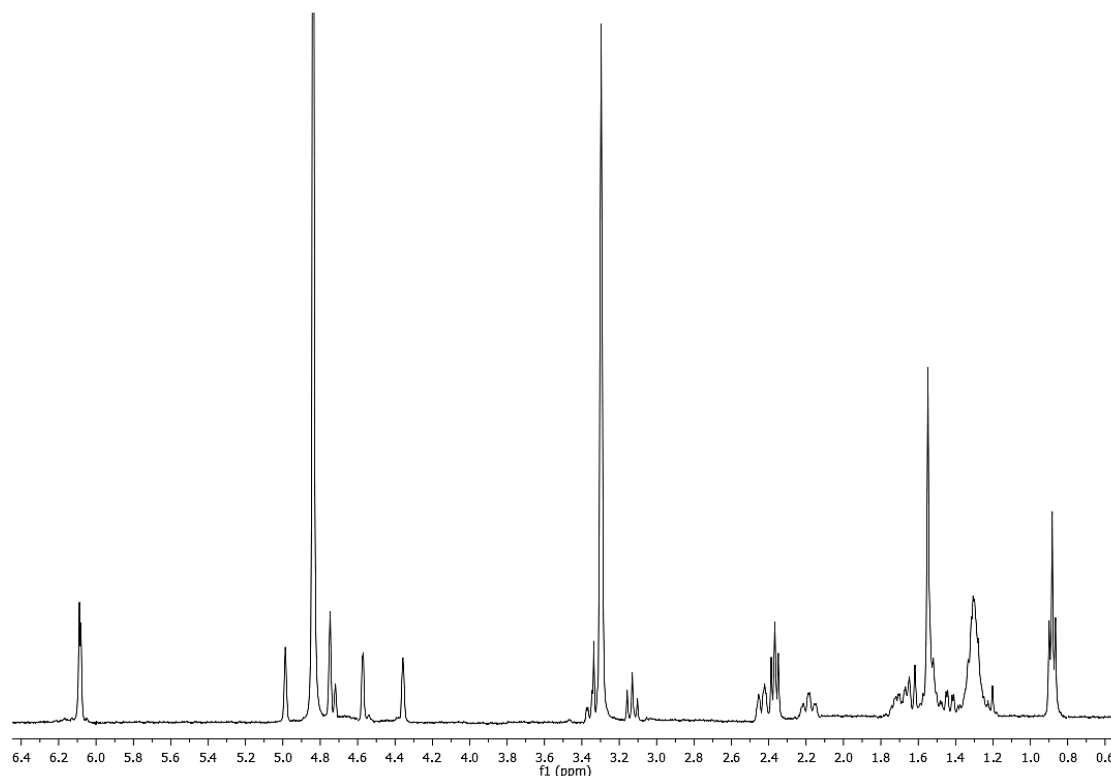

Figure S1. <sup>1</sup>H NMR (CD<sub>3</sub>OD, 400 MHz) of 2 $\alpha$ -hydroxy- $\Delta^{3,7}$ -cannabitol (1).

**$^{13}\text{C}$  NMR ( $\text{CD}_3\text{OD}$ , 100 MHz) of  $2\alpha$ -hydroxy- $\Delta^{3,7}$ -cannabitrinol (1)**

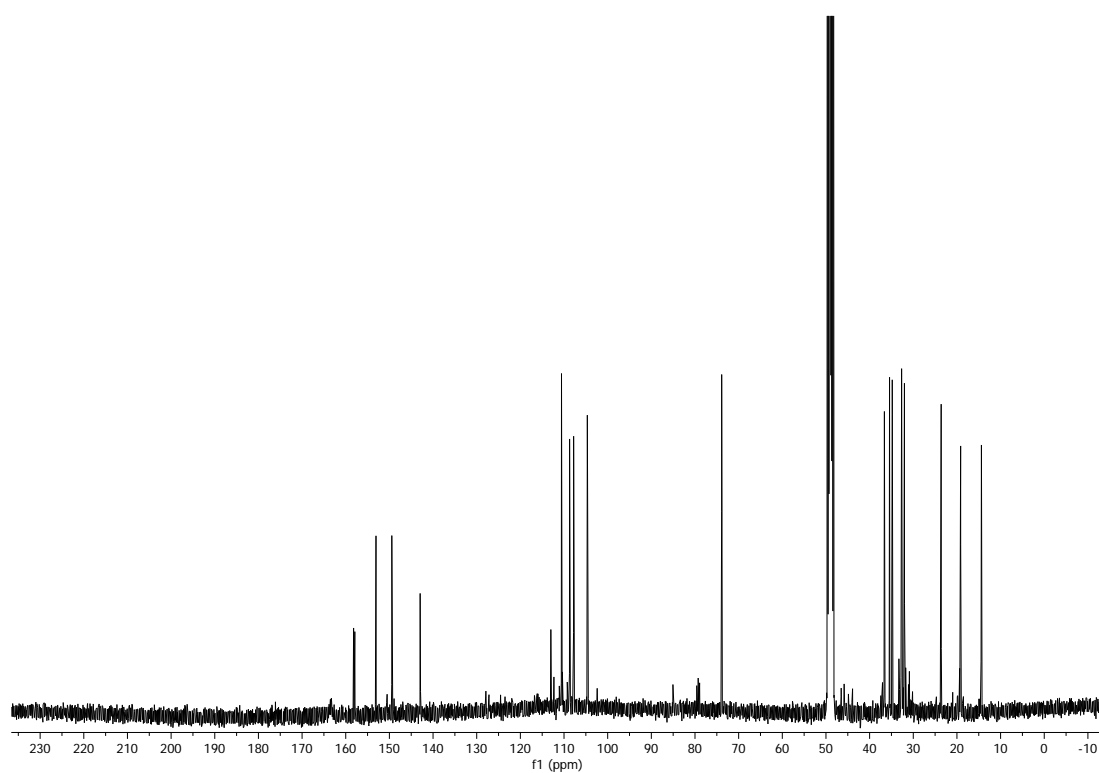

Figure S2.  $^{13}\text{C}$  NMR ( $\text{CD}_3\text{OD}$ , 100 MHz) of  $2\alpha$ -hydroxy- $\Delta^{3,7}$ -cannabitrinol (1).

**COSY spectrum ( $\text{CD}_3\text{OD}$ , 400 MHz) of  $2\alpha$ -hydroxy- $\Delta^{3,7}$ -cannabitrinol (1)**

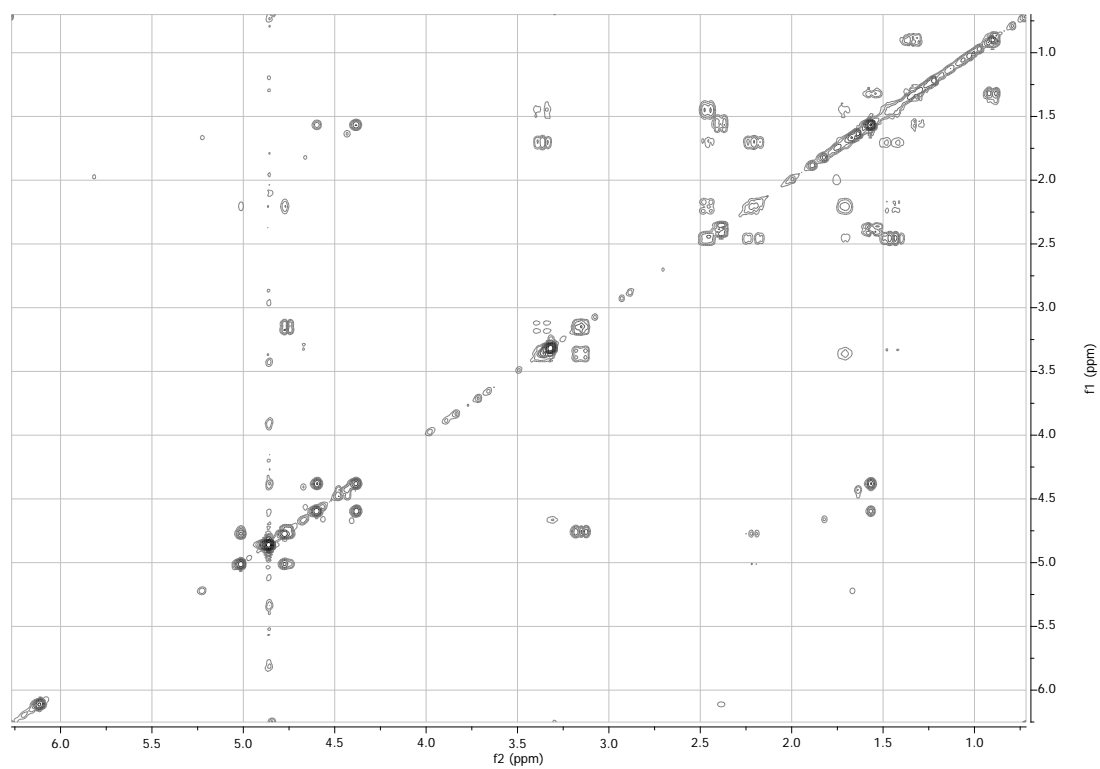

Figure S3. COSY spectrum ( $\text{CD}_3\text{OD}$ , 400 MHz) of  $2\alpha$ -hydroxy- $\Delta^{3,7}$ -cannabitrinol (1).

**HSQC spectrum (CD<sub>3</sub>OD, 400 MHz) of 2 $\alpha$ -hydroxy- $\Delta^{3,7}$ -cannabitrinol (1)**

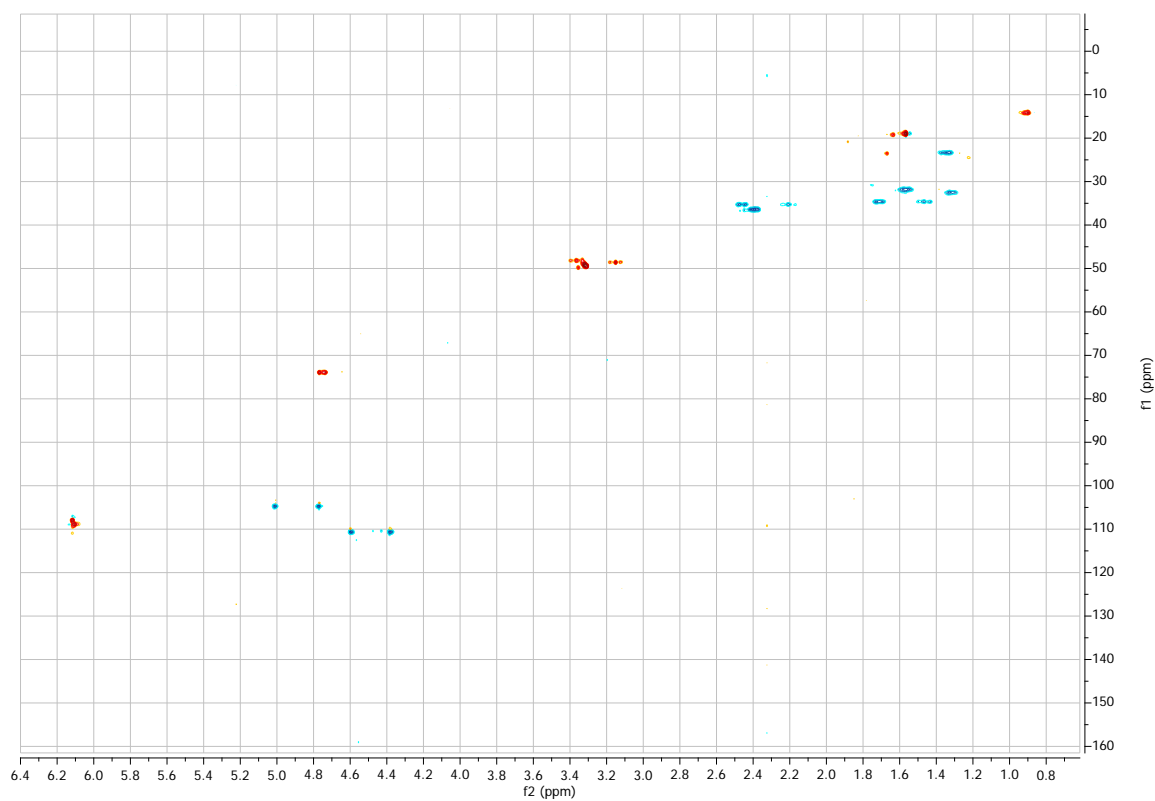

Figure S4. HSQC spectrum (CD<sub>3</sub>OD, 400 MHz) of 2 $\alpha$ -hydroxy- $\Delta^{3,7}$ -cannabitrinol (1).

**HMBC spectrum (CD<sub>3</sub>OD, 400 MHz) of 2 $\alpha$ -hydroxy- $\Delta^{3,7}$ -cannabitrinol (1)**

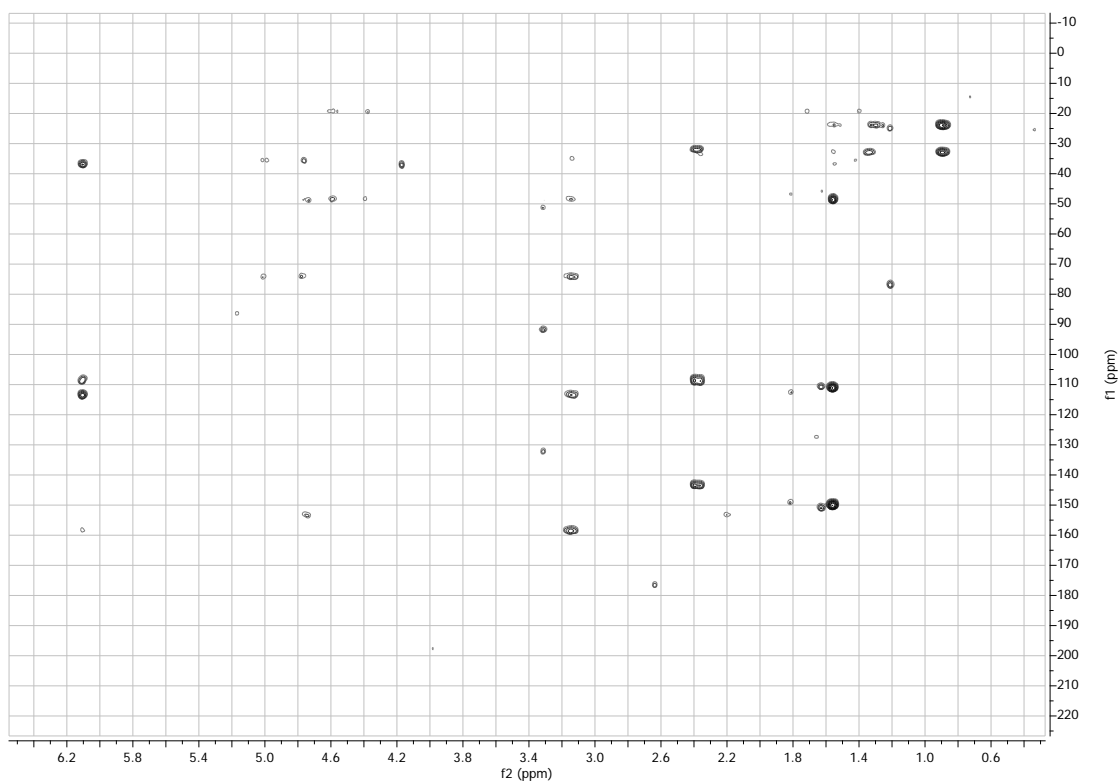

Figure S5. HMBC spectrum (CD<sub>3</sub>OD, 400 MHz) of 2 $\alpha$ -hydroxy- $\Delta^{3,7}$ -cannabitrinol (1).

**$^1\text{H}$  NMR ( $\text{CD}_3\text{OD}$ , 400 MHz) of Cannabidiol (2)**

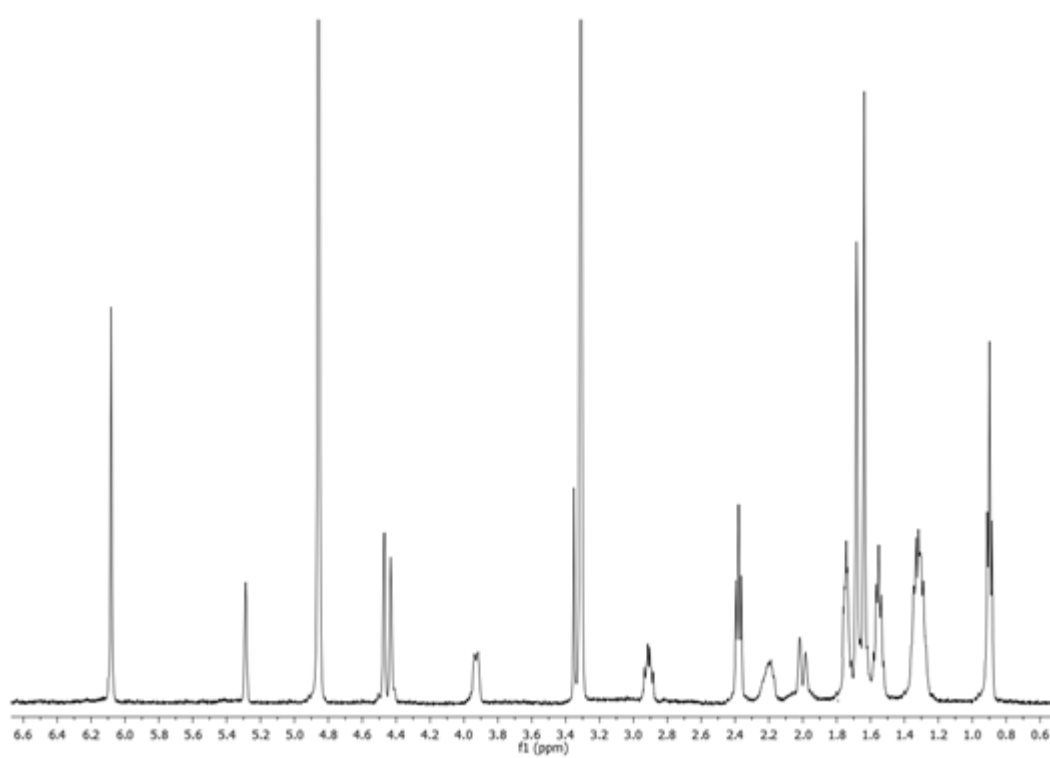

Figure S6.  $^1\text{H}$  NMR ( $\text{CD}_3\text{OD}$ , 400 MHz) of Cannabidiol (2).

**$^1\text{H}$  NMR ( $\text{CD}_3\text{OD}$ , 400 MHz) of Cannabidiolic acid (3)**

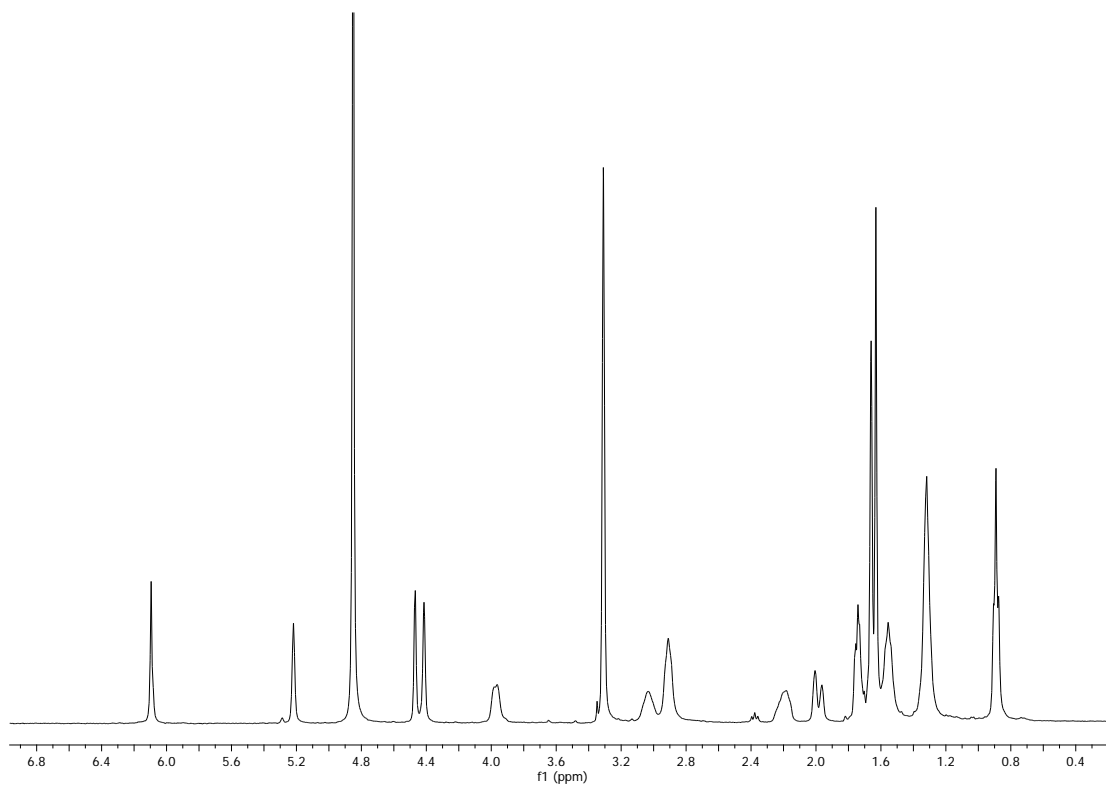

Figure S7.  $^1\text{H}$  NMR ( $\text{CD}_3\text{OD}$ , 400 MHz) of Cannabidiolic acid (3).

**$^1\text{H}$  NMR ( $\text{C}_5\text{D}_5\text{N}$ , 500 MHz) of  $\alpha$ -Cannabispiranol (4)**

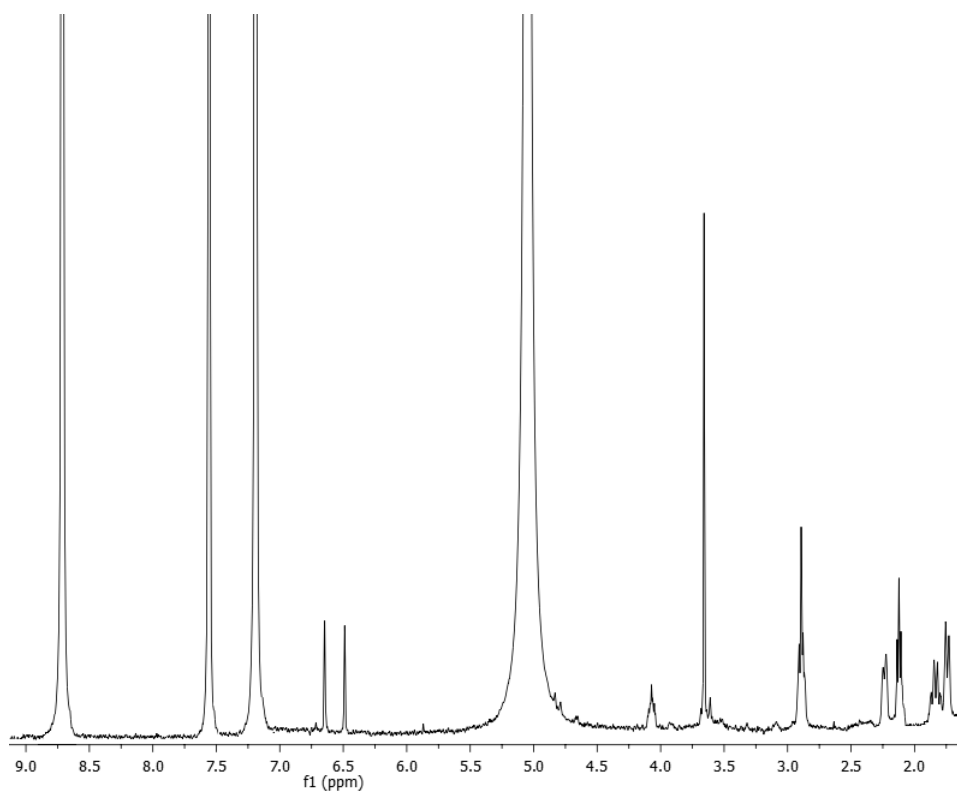

Figure S8.  $^1\text{H}$  NMR ( $\text{C}_5\text{D}_5\text{N}$ , 500 MHz) of  $\alpha$ -Cannabispiranol (4).

**$^1\text{H}$  NMR ( $\text{C}_5\text{D}_5\text{N}$ , 500 MHz) of  $\beta$ -Cannabispiranol (5)**

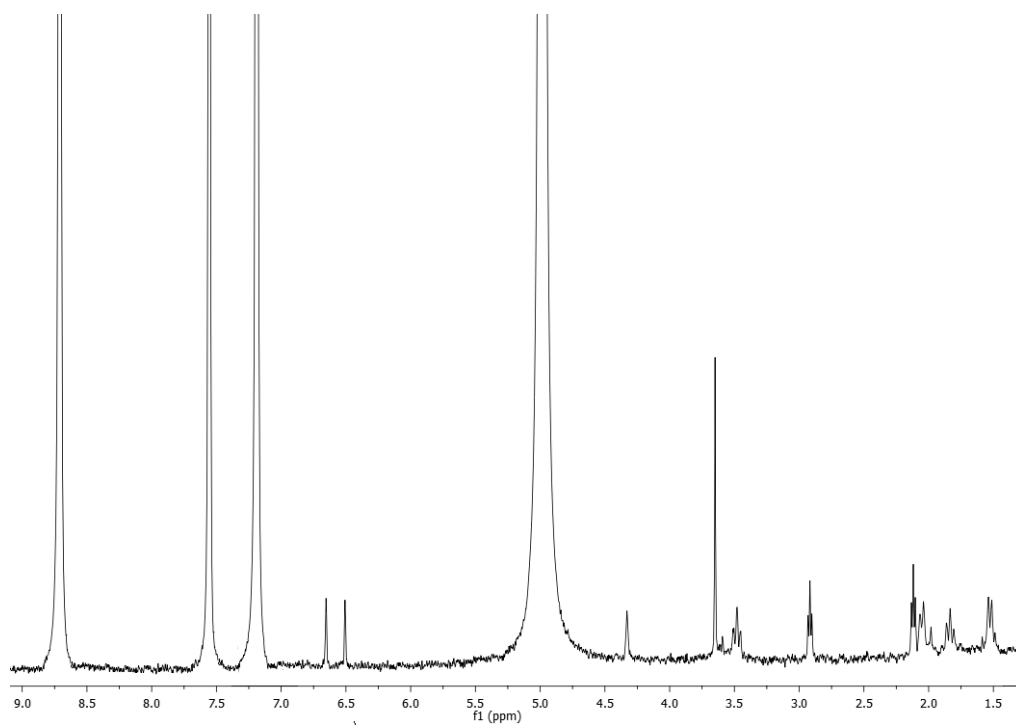

Figure S9.  $^1\text{H}$  NMR ( $\text{C}_5\text{D}_5\text{N}$ , 500 MHz) of  $\beta$ -Cannabispiranol (5).

**$^1\text{H}$  NMR ( $\text{CD}_3\text{OD}$ , 500 MHz) of Canniprene (6)**

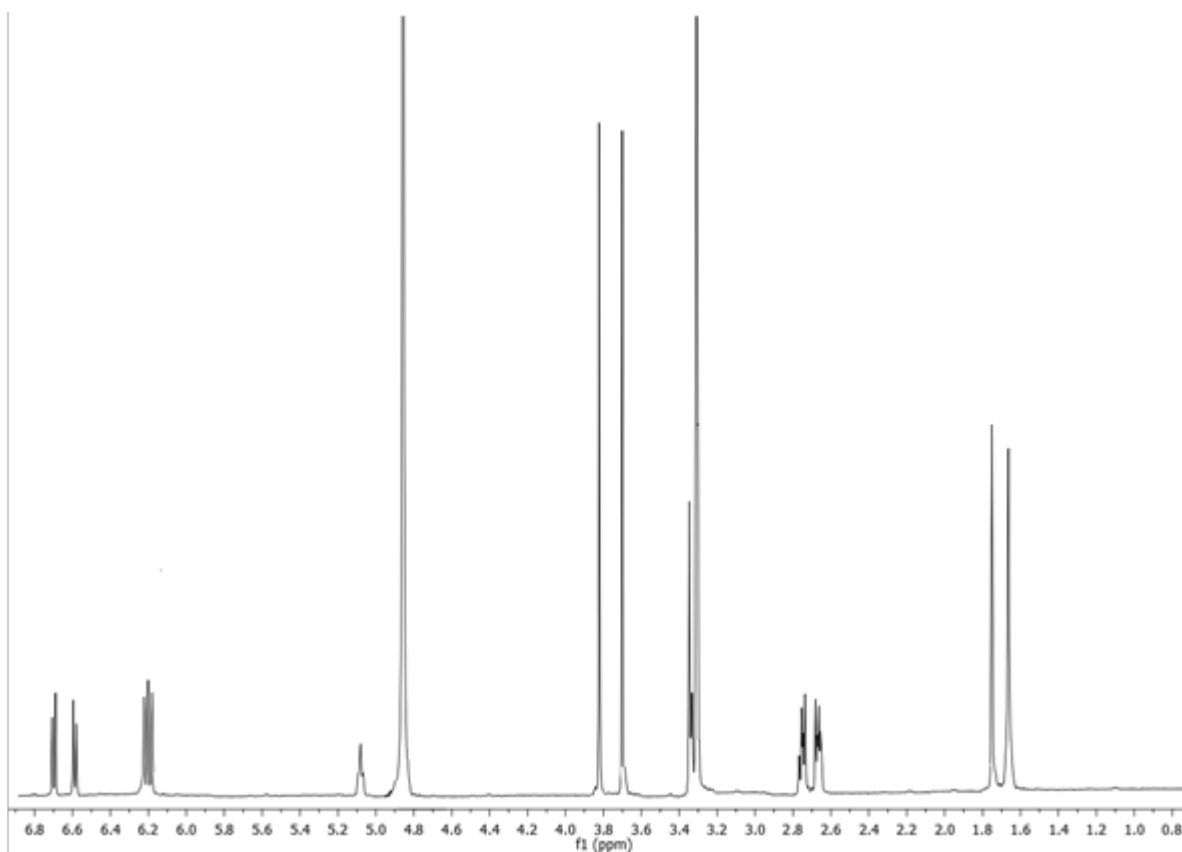

Figure S10.  $^1\text{H}$  NMR ( $\text{CD}_3\text{OD}$ , 500 MHz) of Canniprene (6).

**$^1\text{H}$  NMR ( $\text{CD}_3\text{OD}$ , 400 MHz) of Cannabiripsol (7)**

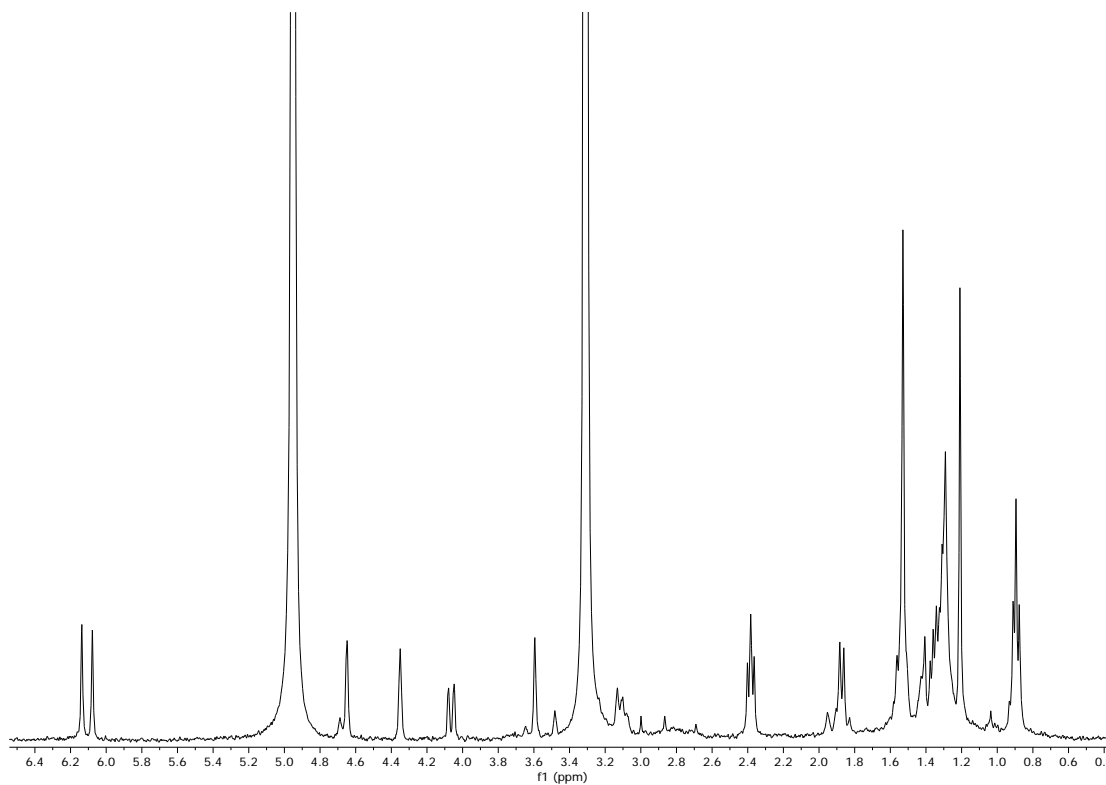

Figure S11.  $^1\text{H}$  NMR ( $\text{CD}_3\text{OD}$ , 400 MHz) of Cannabiripsol (7).

**$^1\text{H}$  NMR ( $\text{CD}_3\text{OD}$ , 400 MHz) of Cannflavine B (8)**

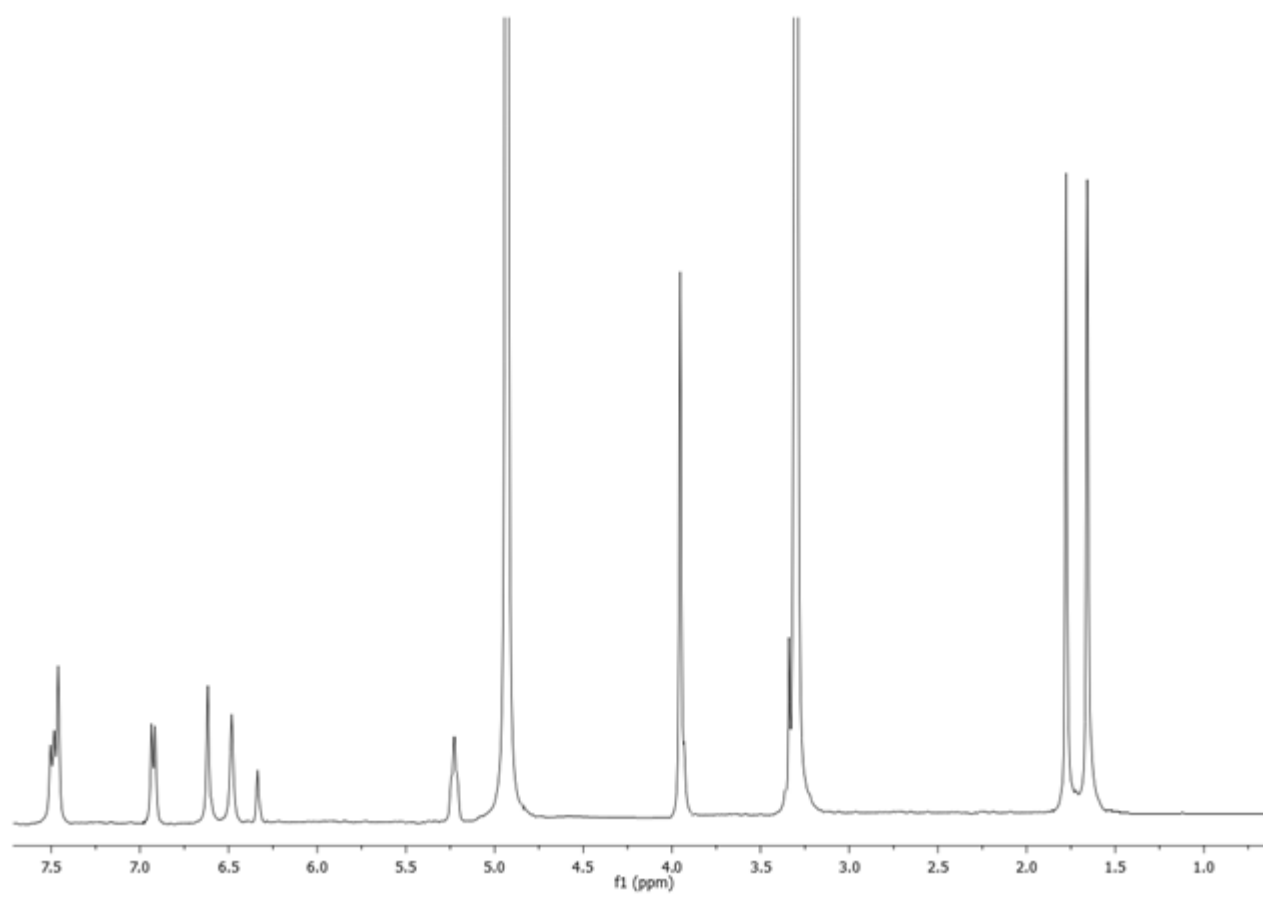

Figure S12.  $^1\text{H}$  NMR ( $\text{CD}_3\text{OD}$ , 400 MHz) of Cannflavine B (8).

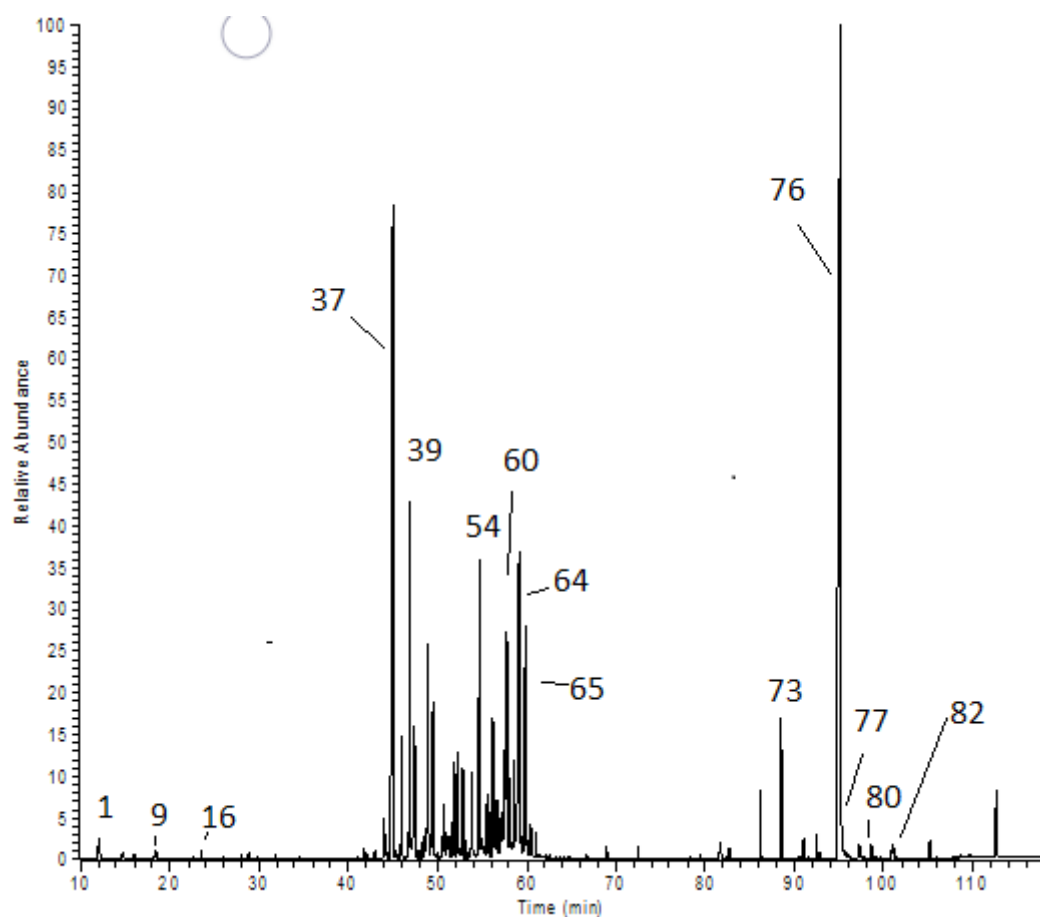

Figure S13. GC-MS TIC chromatogram of *C. sativa* L. cv. *Futura* 75. Numbers refer to those reported in Table 2.

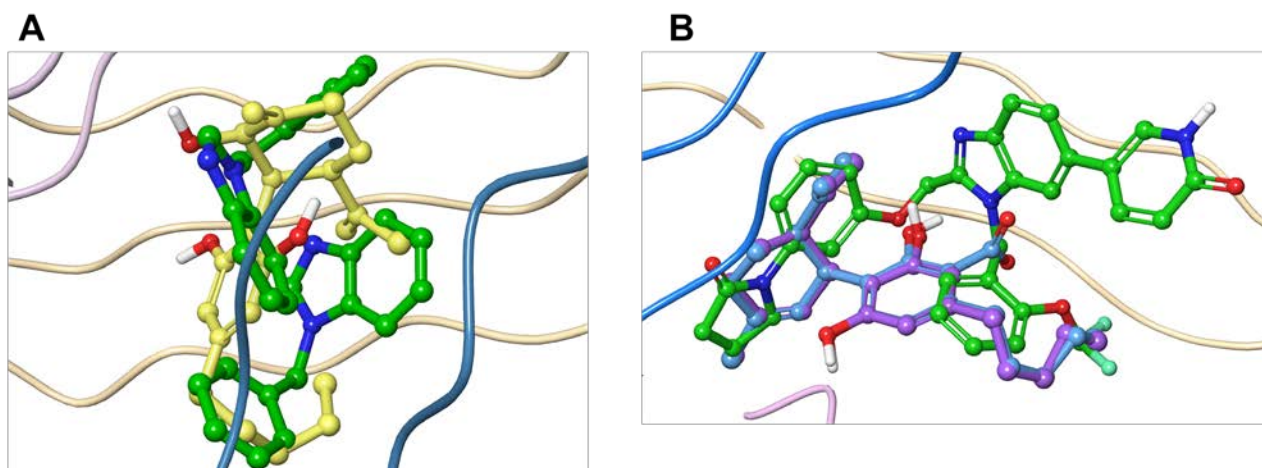

Figure S14. Superimposition of **1** (A) and **2** and **3** (B) with the co-crystallized inhibitors contained in 6X83 and 7KPA, respectively.



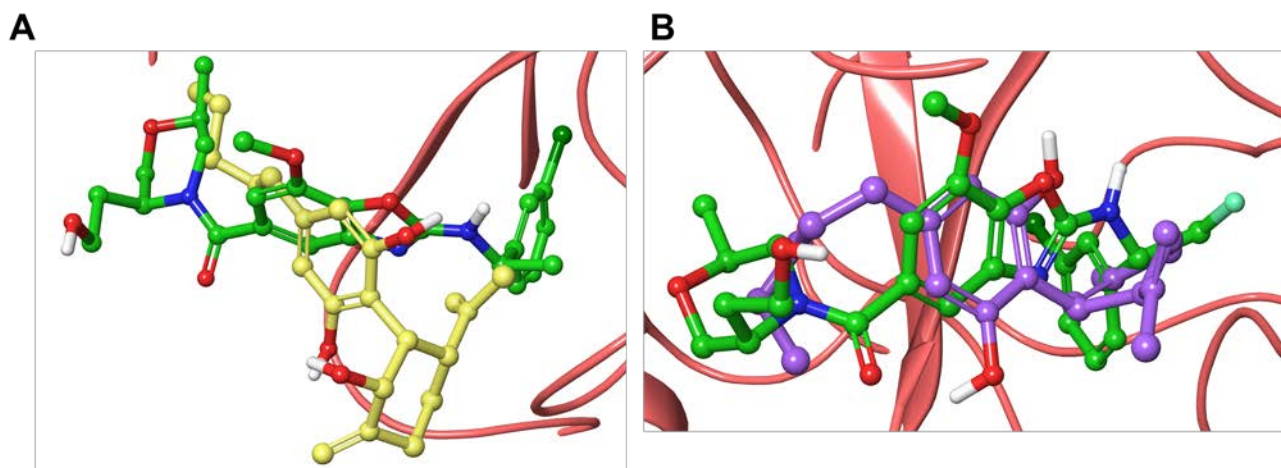

Figure S15. Superimposition of **1** (A) and **2** with the co-crystallized inhibitors contained in 6ZUX and 6ZV8, respectively.

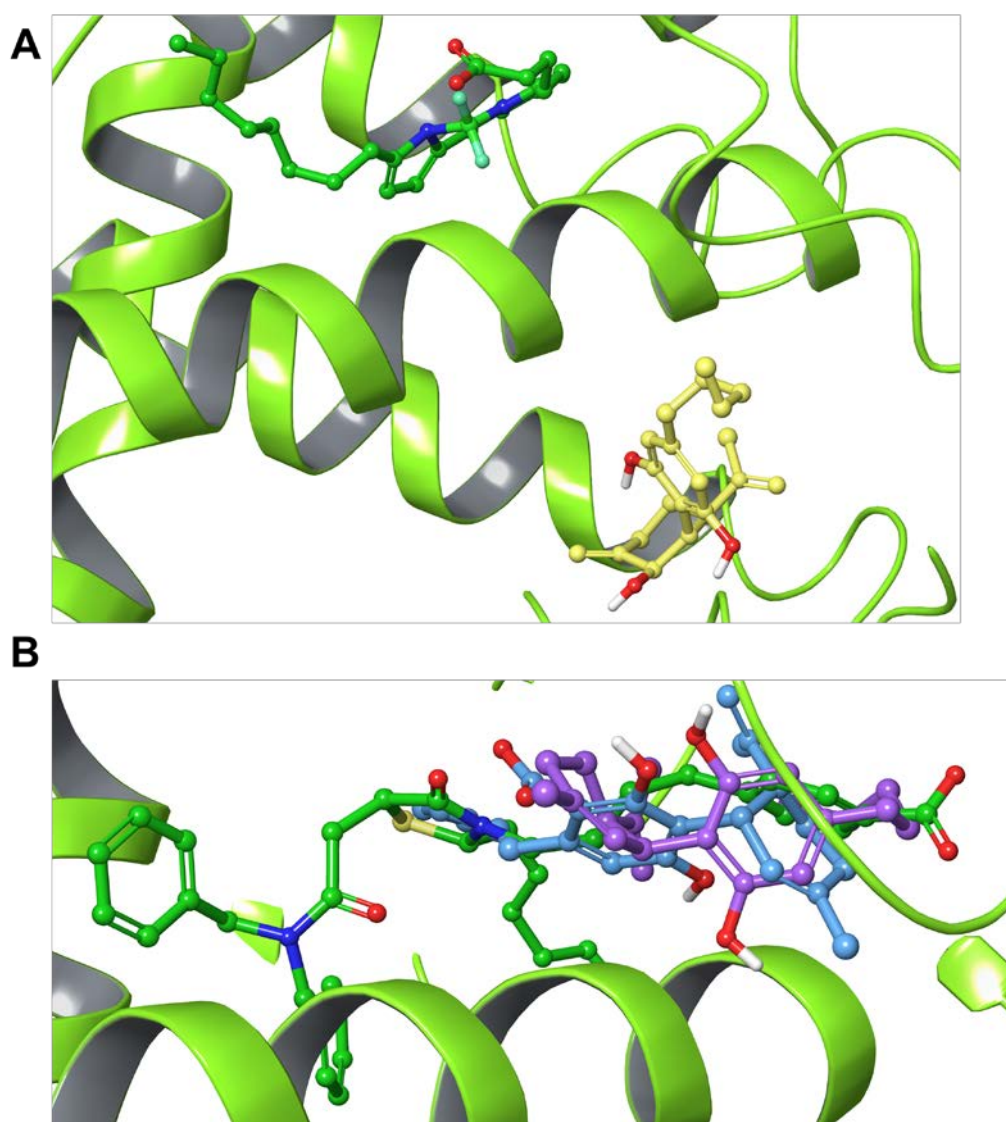

Figure S16. Superimposition of **1** (A) and **2** and **3** (B) with the co-crystallized inhibitors contained in 2ZK6 and 4PRG, respectively.
